# Supplementary material
Source: publisher figshare collection journal article supplement (https://diabetesjournals.figshare.com/articles/dataset/_/22098200)
Supplement: Supplementary file 1 [file 1]

# Initiation of iGlarLixi vs Basal–Bolus Insulin in Adults With Type 2 Diabetes Advancing From Basal Insulin Therapy: The SoliComplex Real-World Study

Kevin M. Pantalone,<sup>1</sup> Caroline Heller,<sup>2</sup> Rosemarie Lajara,<sup>3</sup> Elisheva Lew,<sup>4</sup> Xuan Li,<sup>5</sup> Terry Dex,<sup>5</sup> and C. Rachel Kilpatrick<sup>6</sup>

<sup>1</sup>Cleveland Clinic, Cleveland, OH; <sup>2</sup>Aetion, New York, NY; <sup>3</sup>Southern Endocrinology, Plano, TX; <sup>4</sup>Sanofi, Paris, France; <sup>5</sup>Sanofi, Bridgewater, NJ; <sup>6</sup>Washington Regional Endocrinology, Fayetteville, AR

## BACKGROUND

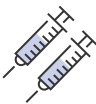

When type 2 diabetes is suboptimally controlled with basal insulin, multiple daily injections of prandial insulin are commonly added (basal–bolus regimen); this can increase treatment burden and risk of hypoglycemia, both of which are of concern to older adults

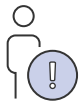

Older patients are a heterogeneous population; for some, stringent glycemic control may not be a top priority, but rather safety and simplicity should take precedence

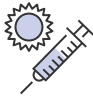

Once-daily iGlarLixi is an alternative to basal–bolus insulin

## OBJECTIVE

Compare treatment persistence, treatment adherence, hypoglycemia rates, A1C change from baseline, HRU, and costs in adults with type 2 diabetes who previously received basal insulin and newly initiated iGlarLixi or basal–bolus insulin

## METHODS

### Retrospective, Real-World Observational Study

#### Study Population

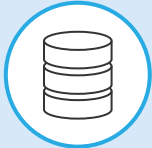

Data from the US Optum Clinformatics claims database

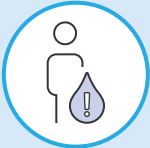

Adults with type 2 diabetes aged ≥18 years at index date who received ≥1 fill of basal insulin

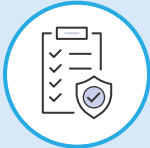

Continuous medical and prescription drug coverage for the 6 months prior to index date

During the 6-month baseline period

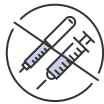

No prior iGlarLixi or bolus insulin fills

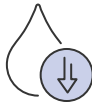

≥1 valid A1C value (between 5 and 15%)

#### Study Design

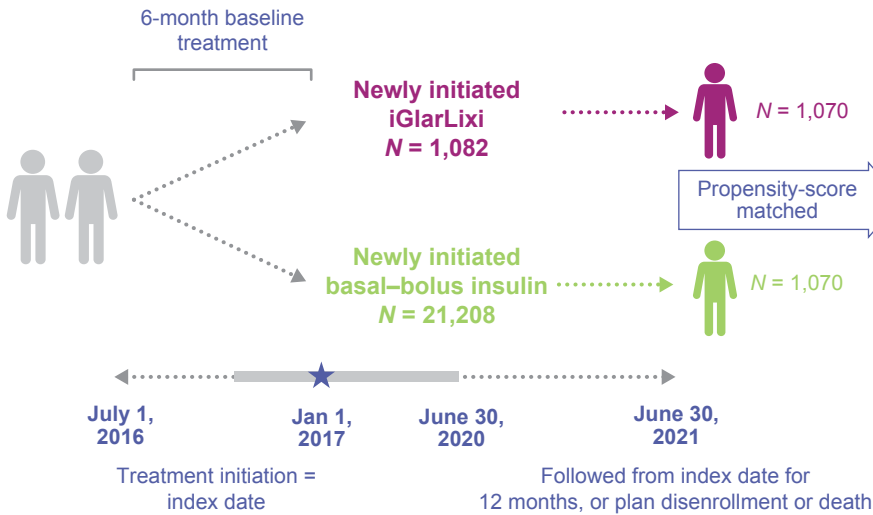

##### Outcomes at 12 months:

- Persistence (primary)
- Adherence
- Hypoglycemia
- HRU
- Costs
- A1C change

##### Assessed to:

- Overall population (primary)
- Subgroup aged ≥65 years
- Subgroup with baseline A1C ≥9%

## KEY RESULTS

### Initiation of iGlarLixi versus basal–bolus insulin was associated with:

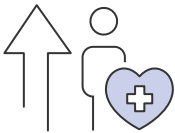

Significantly **higher** treatment persistence

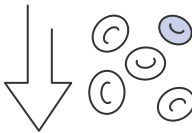

**Lower** hypoglycemia events

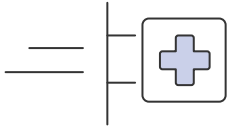

**Similar** ED visits

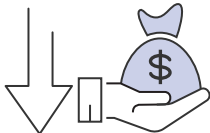

**Lower** all-cause total health care costs

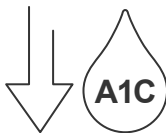

**Slightly smaller** A1C reduction at 12 months

### Outcomes at 12 Months in PSM Cohorts

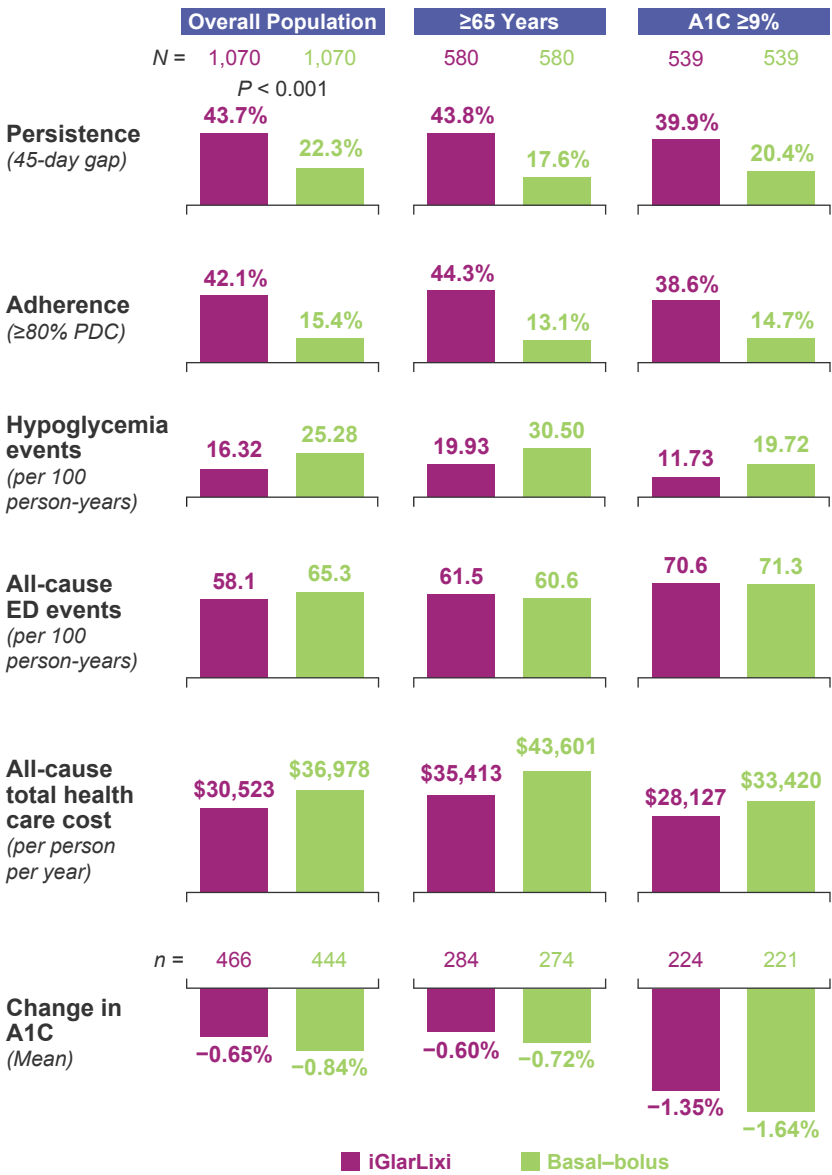

## CONCLUSIONS

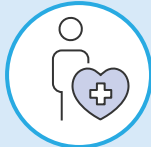

This retrospective study in people with type 2 diabetes suboptimally controlled on basal insulin showed that initiation of once-daily iGlarLixi was associated with higher treatment persistence and adherence, and lower hypoglycemia rates than basal–bolus insulin without increasing HRU or costs

- Although A1C reduction was slightly larger for basal–bolus insulin, basal–bolus regimens have increased treatment complexity
- Subgroup analyses revealed that the results in people aged ≥65 years or with A1C ≥9% were similar to the overall population
- iGlarLixi is a suitable alternative to basal–bolus insulin for older people who may require reduced complexity of treatment and burden of management
